# Supplementary material for: An ultrafast rechargeable aluminium-ion battery
Source: Springer Nature journal article supplement (doi:10.1038/nature14340), 2015-04-01
Supplement: 41586_2015_BFnature14340_MOESM277_ESM.pdf [file 41586_2015_BFnature14340_MOESM277_ESM.pdf]

## Supplementary text

To demonstrate the high flexibility of the Al/graphitic cell, a pouch cell was assembled in the glove box by sandwiching a glass filter paper between a thin Al foil anode (20–50 mg) and a pyrolytic graphite foil (20–30 mg) cathode with a suitable amount (~0.05 mL per mg of graphite foil) of ionic liquid electrolyte ( $\text{AlCl}_3/[\text{EMIm}]\text{Cl}$  = 1.3 by mole). The Al/graphite cell was capable of powering a red LED light under both non-bending and bending conditions ([Video S1](#)). As part of the stability test, a metallic drill penetration test was performed using a fully charged Al/Pg cells connecting with a red LED. The working voltage of the Al/Pg cell was ~1.7 V. A sharp stainless steel drill was driven into the center of the cell body at a constant speed ([Video S2](#)).
